# Supplementary material for: COVID-19 Secondary Infections in ICU Patients and Prevention Control Measures: A Preliminary Prospective Multicenter Study
Source: MDPI journal article supplement (doi:10.3390/antibiotics11081016), 2022-07-28
Supplement: s1 [file s1]

**Table S1.** Multidrug resistant (MDR) pathogen susceptibilities

| SDD | Germ                                                | Colistin | Tobramycin | Gentamicin | Cefotaxime | Piperacillin<br>Tazobactam | Amikacin | Cloxacillin | Ceftazidime | Cefepime | Aztreonam | Meropenem  | Imipenem  |
|-----|-----------------------------------------------------|----------|------------|------------|------------|----------------------------|----------|-------------|-------------|----------|-----------|------------|-----------|
| No  | <i>Klebsiella pneumoniae</i>                        | S (≤2)   | R (>4)     | R (>4)     | R (>32)    | R (>16)                    | S (≤8)   |             |             | R (>8)   | R (>4)    | S (2)      | S (4)     |
| No  | <i>Escherichia coli</i>                             |          | S (≤2)     | S (≤2)     | R (>32)    |                            | S (≤8)   |             |             |          |           | S (≤0.12)  | S (≤0.12) |
| No  | <i>Escherichia coli</i>                             |          | S (≤2)     | S (≤2)     | R (>32)    | S (≤8)                     | S (≤8)   |             |             | R (>8)   | R (>4)    | S (≤ 0.12) | S (≤0.12) |
| No  | <i>Escherichia coli</i>                             | S        | S (≤2)     | S (≤2)     |            | S                          | S (≤8)   |             | R (>32)     | R (>8)   |           | S (2)      | S (≤1)    |
| No  | <i>Stenotrophomonas maltophilia</i>                 |          | R (>4)     | R (>4)     |            | R (>16)                    | R (>16)  |             |             |          | R (>4)    | R (>32)    |           |
| No  | <i>Pseudomonas aeruginosa</i>                       |          | S (≤2)     |            |            | S (16)                     | S (≤8)   |             | S (4)       |          | R (>24)   | R (16)     | R (>8)    |
| No  | <i>Pseudomonas aeruginosa</i><br>Coagulase negative |          | S (≤2)     |            |            | S (16)                     | S (≤8)   |             | S (4)       | S        |           | R (16)     | R (>8)    |
| No  | <i>Staphylococcus</i>                               |          |            | R (>4)     |            |                            |          | R (>2)      |             |          |           |            |           |
| No  | <i>Pseudomonas aeruginosa</i>                       |          | S (≤2)     |            |            | S (≤8)                     | S (≤8)   |             | S (≤1)      |          | S (4)     | S (1)      | S (2)     |
| No  | <i>Pseudomonas aeruginosa</i>                       |          | S (≤2)     |            |            | S (≤8)                     | S (≤8)   |             | S (≤1)      |          | S (4)     | S (2)      | R (8)     |
| No  | <i>Pseudomona putida</i>                            | R (≥16)  | R (4)      | R (2)      |            | R                          | R (32)   |             | R           | R (16)   | R         | R          | R (12)    |
| No  | <i>Klebsiella spp.</i>                              | R (≥16)  | S (≤1)     | S (≤1)     |            | R                          | S (≤1)   |             | R           | R (16)   | S (16)    | R          | R (12)    |
| No  | <i>Enterococcus faecalis</i>                        |          |            | R (SYN-R)  |            |                            | R (32)   |             |             |          |           |            | S (2)     |
| No  | <i>Stenotrophomonas maltophilia</i>                 | S (≤0,5) | S (≤1)     | R (2)      |            |                            | R (4)    |             | R (2)       | R (16)   | R (≥64)   | I (4)      | R (≥16)   |
| No  | <i>Stenotrophomonas maltophilia</i>                 | S (≤0,5) | S (≤1)     | R (2)      |            |                            |          |             | R (2)       | R (16)   | R (≥64)   | I (4)      | R (≥16)   |
| No  | <i>Klebsiella pneumoniae</i>                        | S (≤0,5) | S (≤1)     | S (≤1)     | I (≤0,25)  | R (≥128)                   | S (≤1)   |             | R (4)       | I (0,25) | I (≤1)    | S (≤0,25)  | S (≤0,25) |
| No  | <i>Stenotrophomonas maltophilia</i>                 | R (≥16)  | R (≥1)     | R (4)      |            |                            | R (4)    |             | R (1)       | R (16)   | R (≥64)   | R (≥16)    | R (≥16)   |
| No  | <i>Escherichia coli</i>                             |          | R (≥16)    | S (≤1)     | R (≥64)    |                            |          |             | R (32)      | R (16)   |           |            | S (≤0,25) |
| No  | <i>Pseudomonas putida</i>                           | R (≥16)  | R (4)      | R (2)      |            | R                          | R (32)   |             | R           | R (16)   | R         | R          | R (12)    |
| No  | <i>Pseudomonas putida</i>                           | R (≥16)  | R (4)      | R (2)      |            | R                          | R (32)   |             | R           | R (16)   | R         | R          | R (12)    |
| No  | <i>Klebsiella pneumoniae</i>                        | S (≤0,5) | R (≥16)    | R (≥16)    | R (≥64)    | R (≥128)                   | R (32)   |             | R (≥64)     | R (≥32)  | R (≥64)   | R (12)     | R (12)    |
| Yes | <i>Pseudomonas aeruginosa</i>                       | S (1)    | S          | S          |            | R                          | S        |             | R           | S        | R         | R          | S         |
| Yes | <i>Klebsiella pneumoniae</i>                        |          | R (4)      | R (≥16)    | R (≥64)    | R (32)                     | R (≥64)  |             | R (32)      | R (≥32)  |           | S (≤0.25)  |           |
| Yes | <i>Pseudomonas aeruginosa</i>                       |          | S (≤1)     | S (≤1)     |            | R (≥128)                   | S (0.5)  |             | R (16)      | R (8)    | R (16)    | S (2)      | S (2)     |
| Yes | <i>Pseudomonas aeruginosa</i>                       |          | S (≤1)     | S (≤1)     |            | R (≥128)                   | S (0.5)  |             | R (16)      | R (8)    | R (32)    | S (2)      | S (2)     |
| Yes | <i>Acinetobacterbaummanii</i>                       | S(2)     | S(≤1)      | S(≤1)      |            |                            | S(≤2)    |             |             |          |           | R(≥32)     | R (16)    |

**Table S1. (continuation).** Multidrug resistant(MDR) pathogen susceptibilities

| SDD | Germ                                                | Ceftolozane<br>Tazobactam | Ceftaz.<br>Avibactam | Cefide-<br>rocol | Levofloxacin | Ciprofloxacin | Ampicillin | Amoxicillin-<br>clavulanate | Fosfomycin | Cotrimo-<br>xazole | Carbapene-<br>mase (+) | ESBL<br>(+) |
|-----|-----------------------------------------------------|---------------------------|----------------------|------------------|--------------|---------------|------------|-----------------------------|------------|--------------------|------------------------|-------------|
| No  | <i>Klebsiella pneumoniae</i>                        | R (>4)                    | S (≤2)               |                  |              | S (0.25)      |            | R (>32)                     |            | R (>4/76)          | Yes                    | Yes         |
| No  | <i>Escherichia coli</i>                             |                           |                      |                  |              | R (>1)        |            |                             |            | R (>4/76)          |                        | Yes         |
| No  | <i>Escherichia coli</i>                             |                           |                      |                  |              | R (>1)        |            |                             |            | R (>4/76)          |                        | Yes         |
| No  | <i>Escherichia coli</i>                             | S (≤1)                    | S (≤2)               |                  |              | R (>1)        |            | R (≤8)                      | S (≤16)    | R (>4/76)          |                        | Yes         |
| No  | <i>Stenotrophomonas maltophilia</i>                 |                           |                      |                  | S (≤0.5)     |               |            |                             |            | S (≤2/38)          |                        |             |
| No  | <i>Pseudomonas aeruginosa</i>                       |                           |                      |                  |              | R (>1)        |            |                             |            |                    |                        |             |
| No  | <i>Pseudomonas aeruginosa</i><br>Coagulase negative |                           |                      |                  |              | R (>1)        |            |                             |            |                    |                        |             |
| No  | <i>Staphylococcus</i>                               |                           |                      |                  | R(>1)        |               | R (>4)     | R (>2)                      |            |                    |                        | S<br>(4/76) |
| No  | <i>Pseudomonas aeruginosa</i>                       |                           |                      |                  |              | S (0.25)      |            |                             |            |                    |                        |             |
| No  | <i>Pseudomonas aeruginosa</i>                       |                           |                      |                  | S (≤0.5)     | S (0.5)       |            |                             |            |                    |                        |             |
| No  | <i>Pseudomonas putida</i>                           |                           |                      |                  |              | S (≤0,25)     |            |                             |            |                    |                        | Yes         |
| No  | <i>Klebsiella spp.</i>                              |                           |                      |                  |              | S (≤0,25)     |            |                             |            |                    |                        |             |
| No  | <i>Enterococcus faecalis</i>                        |                           |                      |                  | R (≥8)       | R (≤8)        | S (≤2)     |                             |            |                    |                        |             |
| No  | <i>Stenotrophomonas maltophilia</i>                 |                           |                      |                  |              | I (1)         |            |                             |            | S (≥20)            |                        |             |
| No  | <i>Stenotrophomonas maltophilia</i>                 |                           |                      |                  |              | I (1)         |            |                             |            | S (≥20)            |                        |             |
| No  | <i>Klebsiella pneumoniae</i>                        | S (0,5)                   |                      |                  |              | S (≤0,25)     |            |                             | S (≤16)    | S (≥20)            |                        | Yes         |
| No  | <i>Stenotrophomonas maltophilia</i>                 |                           |                      |                  |              | R (≥4)        |            |                             |            | S (≥20)            |                        |             |
| No  | <i>Escherichia coli</i>                             |                           |                      |                  |              | R (≥4)        | R (≥32)    | R (≥32)                     | S (≤16)    | R (≥320)           |                        | Yes         |
| No  | <i>Pseudomonas putida</i>                           |                           |                      |                  |              | S (≤0,25)     |            |                             |            |                    |                        |             |
| No  | <i>Pseudomonas putida</i>                           |                           |                      |                  |              | S (≤0,25)     |            |                             |            |                    |                        |             |
| No  | <i>Klebsiella pneumoniae</i>                        | R (≥32)                   | R (≥256)             |                  |              | R (≥4)        |            |                             | S (≤16)    | R (≥320)           | Yes                    |             |
| Yes | <i>Pseudomonas aeruginosa</i>                       | S (2)                     | S (8)                |                  | S            | S             |            |                             |            |                    |                        |             |
| Yes | <i>Klebsiella pneumoniae</i>                        |                           |                      |                  |              | R (≥4)        | R (≥32)    | R (≥32)                     | S (≤16)    | S (≥320)           |                        |             |
| Yes | <i>Pseudomonas aeruginosa</i>                       |                           |                      |                  | R (≥8)       | R (2)         |            |                             |            |                    |                        |             |
| Yes | <i>Pseudomonas aeruginosa</i>                       |                           |                      |                  | R (≥8)       | R (2)         |            |                             |            |                    |                        |             |
| Yes | <i>Acinetobacter baumannii</i>                      |                           |                      |                  | R(≥4)        | R(≥4)         |            |                             |            | R(≥320)            |                        |             |

SDD: Selective Digestive Decontamination. S: susceptibility. R: resistance. SYN: Synergy. ESBL: extended-spectrum beta-lactamase. Ceftaz.: ceftazidime
